# Supplementary material for: High-voltage pulse-assisted extraction of flavonoids from kapok using deep eutectic solvent aqueous solutions
Source: Royal Society of Chemistry journal article supplement (doi:10.1039/d2ra03969a), 2022-01-01
Supplement: d2ra03969a1.pdf [file d2ra03969a1.pdf]

**Supplementary Table 1 Advantages and disadvantage of different extraction methods for flavonoids**

| Method                                                              | Advantage                                                                                                                      | Disadvantage                                                                                                                      |
|---------------------------------------------------------------------|--------------------------------------------------------------------------------------------------------------------------------|-----------------------------------------------------------------------------------------------------------------------------------|
| Organic Solvent extraction                                          | Simple operation; low cost.                                                                                                    | Time- and cost-consuming; environment unfriendly; low yield.                                                                      |
| Microwave-assisted extraction                                       | Uniform heating process; high extraction efficiency; easy operation.                                                           | High extraction temperature; instability of the active ingredients; low yield.                                                    |
| Ultrasound Assisted Extraction                                      | High extraction efficiency; low extraction temperature; safety processing.                                                     | Limited effective ultrasonic area; unsuitable for industrialized large-scale production; low yield.                               |
| Enzymatic extraction                                                | Mild conditions, normal temperature and pressure; fast catalytic speed.                                                        | Enzymes are fragile and easily inactivated; low yield.                                                                            |
| Semi-bionic extraction method                                       | Simple equipment; convenient operation; high extraction efficiency; no organic solvent residue.                                | High extraction temperature; instability of the active ingredients; low yield.                                                    |
| Steam explosion                                                     | No need to use harmful chemicals and solvents to avoid secondary pollution.                                                    | Easy to cause structural damage of flavonoids; low yield.                                                                         |
| Supercritical CO <sub>2</sub> Extraction                            | Easy temperature control; high safety; no organic solvent residue; long maintenance of the biological activity of the product. | High requirements of the equipment; large consumption of the energy; unsuitable for large-scale industrial production; low yield. |
| Subcritical Fluid Extraction                                        | Non-toxic, environmentally friendly; low-energy; suitable for a large-scale industrialized production.                         | High-cost of the device; limited application to a certain subcritical fluid; low yield.                                           |
| Ionic liquid extraction                                             | Good stability, strong dissolving ability, structure can be designed                                                           | Difficulty in purification; low yield.                                                                                            |
| Deep eutectic solvents coupled with Pulsed electric field (PEF-DES) | Green solvent; high extraction efficiency; less time-consuming; good stability; suitable for industrialized production.        | /                                                                                                                                 |
